# Supplementary material
Source: PubMed Central journal article supplement (PMC7322946)
Supplement: advancesADV2020001776-suppl1.pdf [file advancesADV2020001776-suppl1.pdf]

|                                            | Flow adhesion  | Aggregometry   | Receptor density | sGPVI          |
|--------------------------------------------|----------------|----------------|------------------|----------------|
|                                            | n=14           | n=20           | n=15             | n=30           |
| <b>Patient characteristics</b>             |                |                |                  |                |
| Age, years                                 | 55 (35-63)     | 40 (30-54)     | 44 (22-57)       | 43 (30-56)     |
| Male, n (%)                                | 11 (79%)       | 15 (75%)       | 11 (73%)         | 25 (83%)       |
| Injury to sample time, minutes             | 106 (93-115)   | 107 (94-115)   | 96 (82-108)      | 108 (103-115)  |
| <b>Admission Physiology</b>                |                |                |                  |                |
| Heart rate, beats/min                      | 108 (59-120)   | 110 (81-121)   | 107 (73-120)     | 108 (67-119)   |
| sBP, mmHg                                  | 122 (64-133)   | 112 (95-143)   | 116 (89-127)     | 116 (63-141)   |
| Lactate, mmol/L                            | 2.4 (1.9-7.0)  | 2.8 (1.6-5.6)  | 3.4 (2.6-7.2)    | 3.5 (1.7-6.3)  |
| Base Deficit, mmol/L                       | 5.0 (2.5-12.8) | 4.5 (2.5-15.0) | 4.9 (3.6-11.7)   | 4.9 (1.6-14.5) |
| Glasgow Coma Score                         | 8 (3-15)       | 12 (3-15)      | 9 (5-15)         | 13 (3-15)      |
| <b>Injury characteristics</b>              |                |                |                  |                |
| Blunt mechanism, n (%)                     | 13 (93%)       | 18 (90%)       | 12 (80%)         | 25 (83%)       |
| Injury Severity Score                      | 37 (22-42)     | 36 (12-43)     | 34 (19-43)       | 34 (15-41)     |
| AIS Head & Neck                            | 1 (0-4)        | 0 (0-5)        | 0 (0-5)          | 0 (0-4)        |
| AIS Thorax                                 | 3 (3-4)        | 3 (0-4)        | 3 (0-4)          | 3 (0-4)        |
| AIS Abdomen                                | 2 (0-3)        | 0 (0-2)        | 2 (0-4)          | 2 (0-3)        |
| AIS Extremity and Pelvis                   | 3 (0-4)        | 2 (0-4)        | 3 (0-3)          | 3 (0-4)        |
| <b>Fluid &amp; Blood products</b>          |                |                |                  |                |
| Pre-baseline crystalloid, ml               | 0 (0-450)      | 0 (0-250)      | 0 (0-450)        | 0 (0-500)      |
| Pre-baseline PRBC, units                   | 1 (0-4)        | 1 (0-3)        | 0 (0-2)          | 1 (0-3)        |
| 24hr PRBC, units                           | 3 (0-7)        | 4 (0-14)       | 3 (0-4)          | 3 (0-15)       |
| <b>Outcomes</b>                            |                |                |                  |                |
| ICU length of stay, days <sup>1</sup>      | 12 (2-14)      | 11 (1-14)      | 9 (5-17)         | 6 (2-14)       |
| Hospital length of stay, days <sup>1</sup> | 55 (8-61)      | 40 (9-58)      | 25 (9-43)        | 28 (8-58)      |
| Ventilator days                            | 4 (1-10)       | 2 (1-9)        | 4 (0-11)         | 1 (1-8)        |
| Vasopressor days                           | 4 (1-6)        | 1 (0-8)        | 4 (0-7)          | 1 (0-6)        |
| MODS, n (%) <sup>2</sup>                   | 8 (57%)        | 11 (55%)       | 9 (60%)          | 14 (47%)       |
| 28-day mortality, n (%)                    | 5 (36%)        | 7 (35%)        | 4 (27%)          | 11 (37%)       |
| Days to death                              | 1 (1-13)       | 1 (1-8)        | 2 (1-12)         | 1 (1-6)        |

<sup>1</sup> Survivors only

<sup>2</sup> Sequential organ failure assessment (SOFA) score  $\geq 6$  on at least 2 consecutive days

**Supplemental Table 1: Characteristics of trauma patients in individual experimental group.** Data are reported as median with interquartile range unless stated. Some patients are included in more than one group. sBP, systolic blood pressure; AIS, abbreviated injury score; PRBC, packed red blood cells; ICU, Intensive care unit; MODS, multiple organ dysfunction syndrome.
